# Supplementary material
Source: PubMed Central journal article supplement (PMC5981075)

## Supplemental Information

### Recycling of over-activated acyls by a Type II Thioesterase during Calcimycin biosynthesis in *Streptomyces chartreusis* NRRL 3882

Hao Wu<sup>1#</sup>, Jingdan Liang<sup>1#</sup>, Lixia Gou<sup>2</sup>, Qiulin Wu<sup>1</sup>, Wei-Jun Liang<sup>3</sup>, Xiufen Zhou<sup>1</sup>, Ian J Bruce<sup>4</sup>, Zixin Deng<sup>1\*</sup>, and Zhijun Wang<sup>1\*</sup>

1, State Key Laboratory of Microbial Metabolism and School of Life Science & Biotechnology,  
Shanghai Jiao Tong University, Shanghai 200030, China

2, College of Life Science, North China University of Science and Technology, Tangshan, Hebei 063210,  
China

3, Department of Life and Environmental Sciences, Faculty of Science and Technology, Bournemouth  
University, Talbot Campus, Fern Barrow, Poole, Dorset, United Kingdom, BH12 5BB

4, School of Physical Sciences, University of Kent, Canterbury, Kent, United Kingdom, CT2 7NJ

\*Correspondence:

Zhijun Wang, [wangzhijun@sjtu.edu.cn](mailto:wangzhijun@sjtu.edu.cn)

Zixin Deng, [zxdeng@sjtu.edu.cn](mailto:zxdeng@sjtu.edu.cn)

#: these authors contribute equally to this work

## Supplemental Methods

### Calcimycin production time course experiments

*S. chartreusis* NRRL 3882 WT (200mL culture in 500mL baffled conical flasks) was grown at 30 °C for up to 9 days. 20 ml of culture was removed aseptically every 24 hours and assayed for calcimycin as described in the **Material and Methods** section. All experiments were repeated triplicate.

### Quantification of *calG* mRNA present in *S. chartreusis* NRRL 3882 WT cultures by qPCR

Using the results obtained from the calcimycin production time course experiments described above (Fig. S8), we selected the collection time points of 48 and 120 h for additional assay of the culture for *calG* transcript. These two time points were chosen because at 48 h calcimycin starts to be present in the culture and at 120 h it begins to be produced at high level. In addition the effect of supplementation of growth medium with divalent cations, 10 mM MnCl<sub>2</sub>, CaCl<sub>2</sub>, MgCl<sub>2</sub>, or 1 mM FeCl<sub>2</sub>, on *calG* transcript level was also investigated. These concentrations were selected for study on the basis of data presented in Table S5. Effectively they represent ion concentrations at which calcimycin production by *S. chartreusis* NRRL 3882 WT was greatest whilst cezomycin was lowest. All experiments were conducted in triplicate and followed the general protocol described above for the time course experiments with the exception that cultures were supplemented with the relevant metal ions. To ensure data consistency half the culture was sampled at 48 and the remaining half at 120 h and subjected to total cellular RNA extraction, reverse transcription and qPCR.

Total cellular RNA was prepared using Isogen reagent (Nippon Gene, Toyama, Japan) according to the manufacturer's instructions. RNA concentrations were measured using a Nanodrop 2000 Spectrophotometer (Thermo Fisher Scientific Inc.) and to ensure the complete removal of DNA each total RNA sample (1 mg) was treated with 1U of DNase I (Invitrogen, Carlsbad, CA, USA) for 15min at 25 °C. The absence of DNA was confirmed by PCR using primers G-QF1 and G-QF2 (Table 3). Only total RNA samples which lacked the characteristic 200 bp band produced by the primers after agarose gel electrophoresis were used in subsequent experiments.

Reverse transcription of the total RNA to cDNA was carried out using the TransScript® All-in-One First-Strand cDNA Synthesis SuperMix (AT341-01, Transgen Biotech, <http://www.transgenbiotech.com/>) according to the manufacturer's instructions. Briefly, this kit uses 9 nt length primers with random sequences

in the reverse transcription of mRNA to short single stranded cDNA whose copy number reflects original mRNA abundance. The resulting cDNA pool is then suitable for qPCR using gene specific primers in which the first cycle is the synthesis of short double stranded cDNA fragments. cDNA product concentrations were assayed using Nanodrop 2000 (Thermo Fisher Scientific Inc.) and cDNA samples stored at -80 °C until required. qPCR reaction mixtures (25 µL) contained 150 ng cDNA, 12.5 µl SYBR Green qPCR Master Mix (Thermo Fisher Scientific Inc.) and 50 nM of the forward and reverse *calG* primers G-QF1 and G-QF2 (Table 3). *calG* transcript levels are represented relative to that of the house-keeping gene, *hrdB*, used as an internal standard, which was co-amplified with *calG* cDNA using the *hrdB* primers shown in Table 3. qPCR reactions were cycled at 95 °C for 10 min followed by 40 cycles of 95 °C for 15 sec and 60 °C for 1 min. A dissociation curve from 55 °C to 90 °C at 0.5 °C increments with a dwelling time of 30 seconds was constructed to confirm product identity and reaction specificity. 7500 software V 2.0.1 (Applied Biosystems) was used for results calculations.

## Supplemental tables and figures

**Table S1.** Physicochemical data relating to compound 3, cezomycin, N-demethyl-calcimycin, calcimycin and related SNAC and CoA variants.

|                                 |                                                                                     | Formula                                                                         | Calculated<br>Mass | [M+H] <sup>+</sup> |
|---------------------------------|-------------------------------------------------------------------------------------|---------------------------------------------------------------------------------|--------------------|--------------------|
| Compound 3                      | 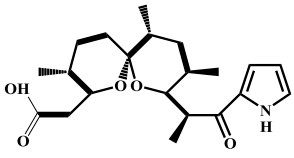   | C <sub>21</sub> H <sub>31</sub> NO <sub>5</sub>                                 | 377.2389           | 378.2392           |
| Compound 3-SNAC                 |    | C <sub>25</sub> H <sub>38</sub> N <sub>2</sub> O <sub>5</sub> S                 | 478.2501           | 479.2574           |
| Cezomycin                       |    | C <sub>28</sub> H <sub>34</sub> N <sub>2</sub> O <sub>6</sub>                   | 494.2417           | 495.249            |
| Cezomycin-SNAC                  |   | C <sub>32</sub> H <sub>41</sub> N <sub>3</sub> O <sub>6</sub> S                 | 595.2716           | 596.2789           |
| N-demethyl-calcimycin           |  | C <sub>28</sub> H <sub>35</sub> N <sub>3</sub> O <sub>6</sub>                   | 509.2526           | 510.2523           |
| N-demethyl-calcimycin-SNAC<br>C |  | C <sub>32</sub> H <sub>42</sub> N <sub>4</sub> O <sub>6</sub> S                 | 610.2825           | 611.2898           |
| Calcimycin                      |  | C <sub>29</sub> H <sub>37</sub> N <sub>3</sub> O <sub>6</sub>                   | 523.2682           | 524.2534           |
| Calcimycin-SNAC                 |  | C <sub>33</sub> H <sub>44</sub> N <sub>4</sub> O <sub>6</sub> S                 | 624.2982           | 625.3054           |
| Compound 3-CoA                  |  | C <sub>42</sub> H <sub>65</sub> N <sub>8</sub> O <sub>20</sub> P <sub>3</sub> S | 1126.3234          | 1127.332<br>1      |

---

N-demethyl-calcimycin-CoA

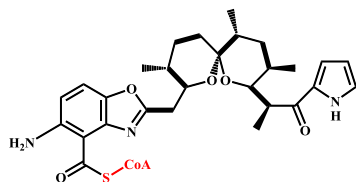

$C_{49}H_{69}N_{10}O_{21}P_3$

1258.3572

1259.364

S

5

Calcimycin-CoA

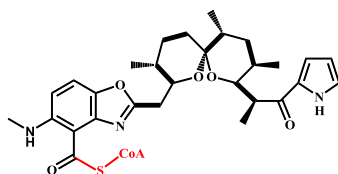

$C_{50}H_{71}N_{10}O_{21}P_3$

1272.3729

1273.380

S

2

---

**Fig. S1. Q-TOF MS characterisation of compound 3, cezomycin, N-demethyl-calcimycin and calcimycin related SNAC derivatives.** Pyrrole moiety ( $m/z=94$ ) and benzoxazole moiety of various calcimycin related compounds. (A) Spiroketal ring of compound 3 ( $m/z=360$ ). (B) Benzoxazole moiety of cezomycin ( $m/z=160$ ). (C) Benzoxazole moiety of N-demethyl-calcimycin ( $m/z=175$ ). (D) Benzoxazole moiety of calcimycin ( $m/z=189$ ).

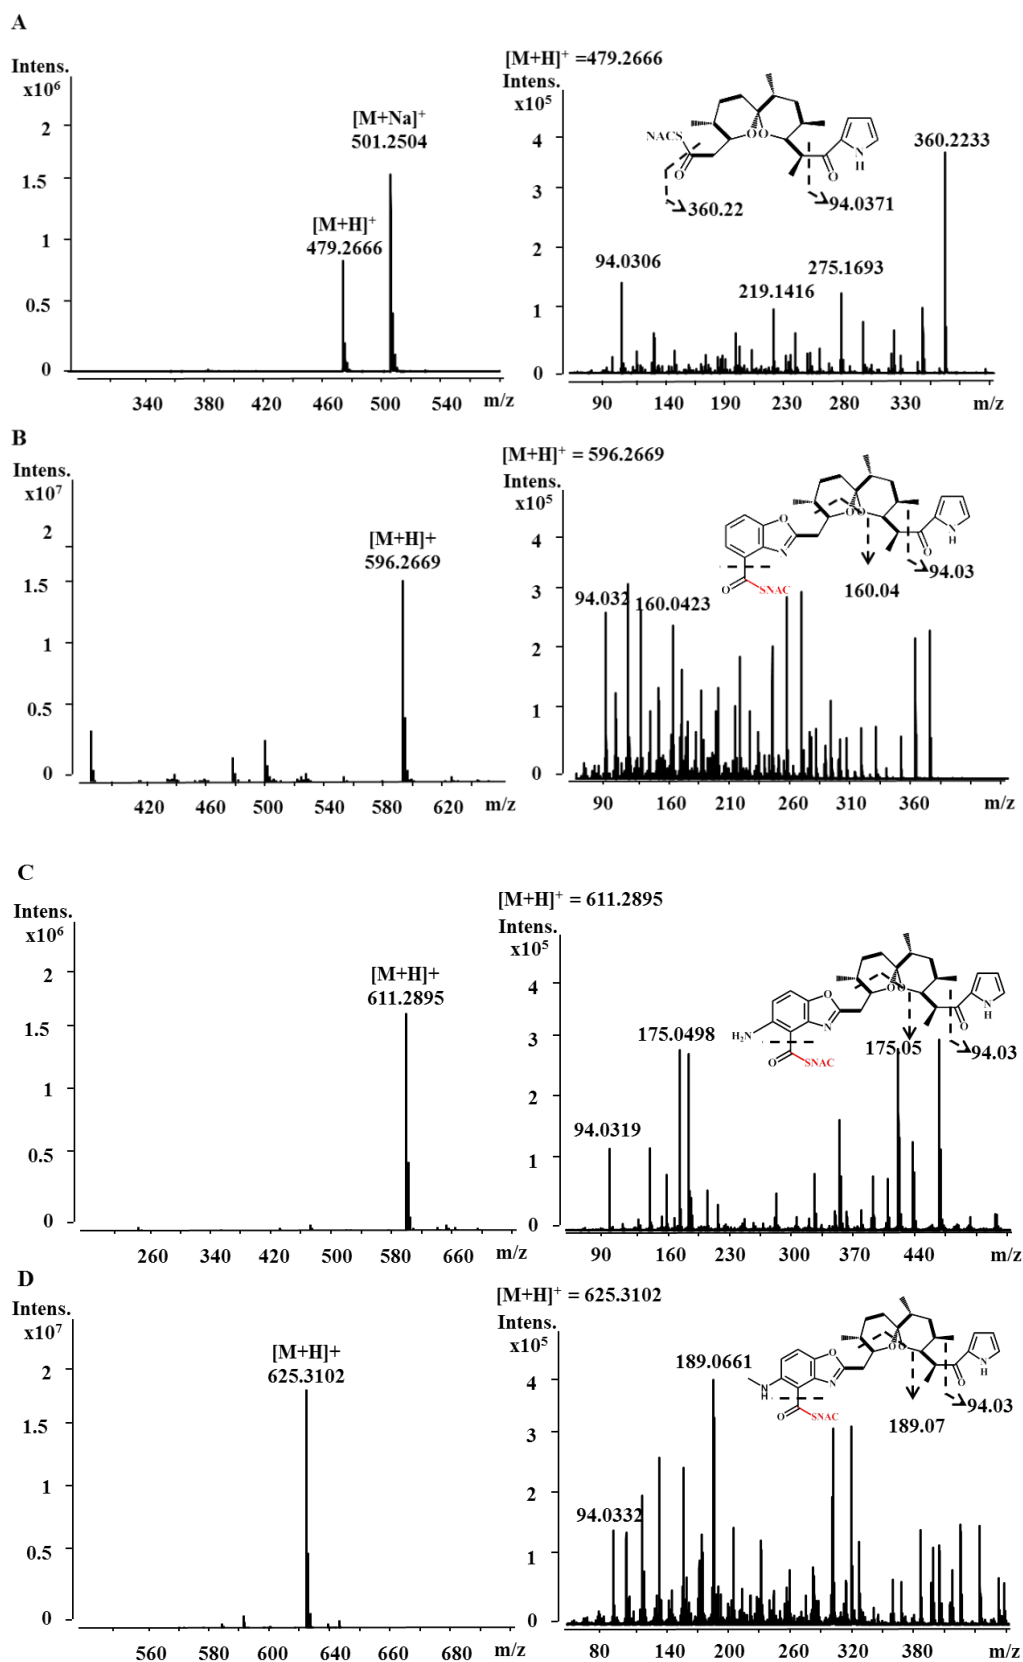

**Fig. S2. Q-TOF MS characterisation of compound 3, cezomycin, N-demethyl-calcimycin, calcimycin related CoA derivatives.** Pyrrole moiety ( $m/z=94$ ) and benzoxazole moiety of various calcimycin related compounds were detected. (A) Spiroketal ring of compound 3 ( $m/z=360$ ). (B) Benzoxazole moiety of N-demethyl-calcimycin ( $m/z=175$ ). (C) Benzoxazole moiety of calcimycin ( $m/z=189$ ).

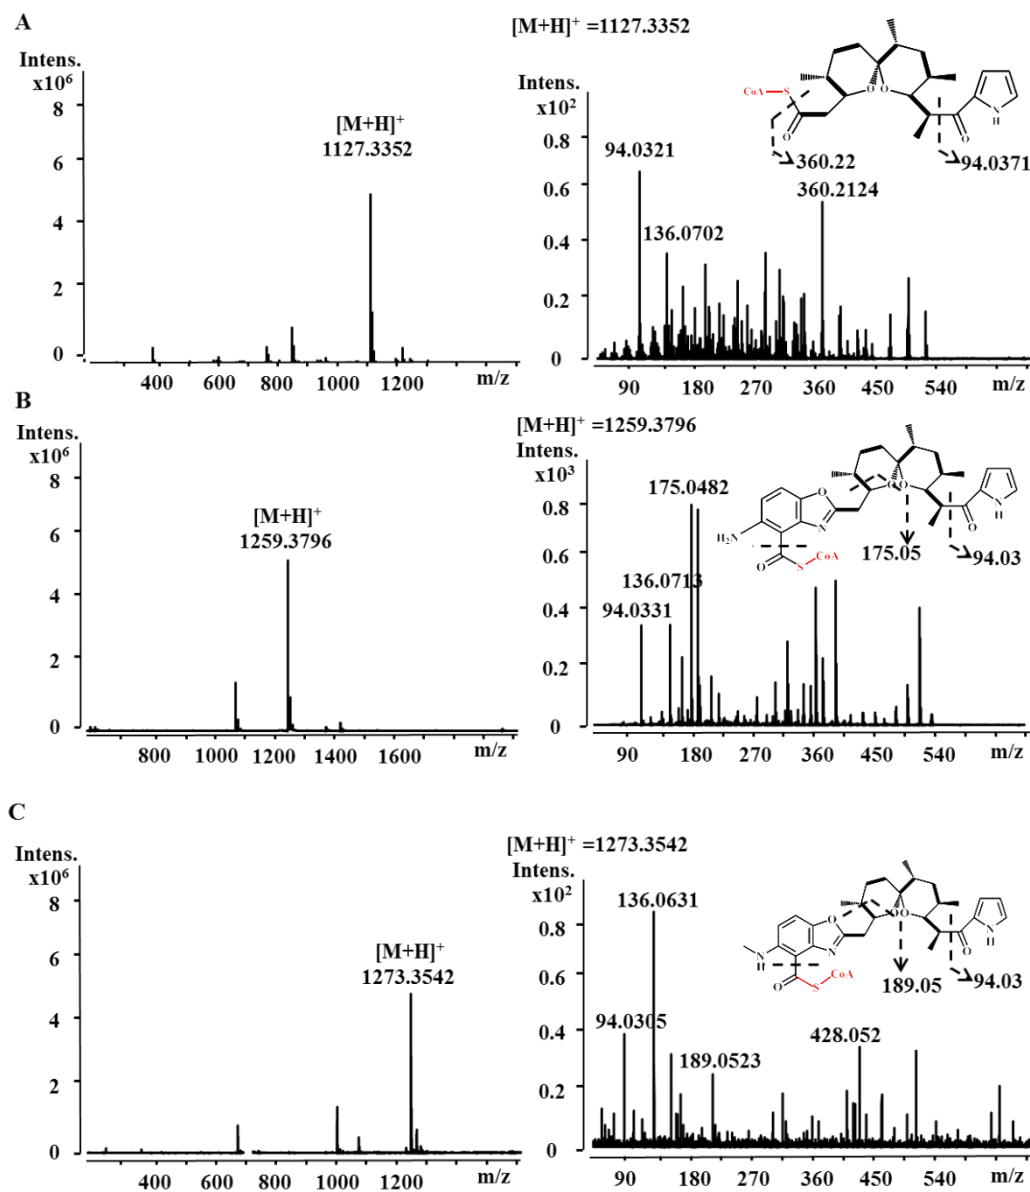

**Fig. S3. Protein sequence alignments of CalG with other typical TEIs.**

CalG protein sequence was aligned with TycF from *Brevibacillus brevis* (accession number BAH43770), GrsT from *Paenibacillus mucilaginosus* (accession number AEI41826), Tylo from *Streptomyces bikiniensis* (accession number AAS79448) and FscTE from *Streptomyces sp.* FR-008 (accession number AAQ82559). Identical amino acids are shaded black, while similar amino acids are shaded gray. The highly conserved GHSXG motif is boxed and consensus residues are marked with asterisk.

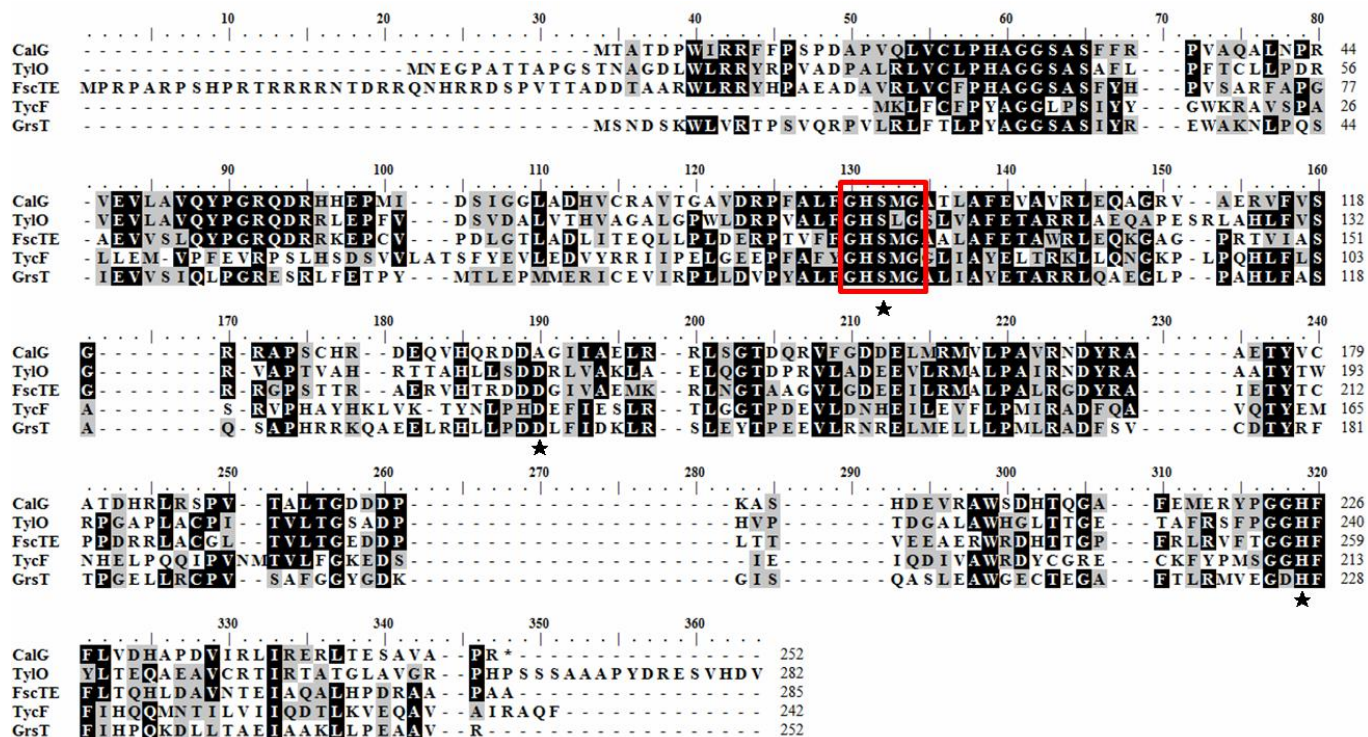



**Fig. S4. Construction of the  $\Delta calG$  strain by PCR-targeting.**

(A) Double crossover replacement generated strain GLX16 ( $\Delta calG$ ). The black rectangles represent the positions of the primers used to generate the PCR products. (B) Ethidium bromide-stained agarose gel. The size of the 1.69 kb band from GLX16 confirmed successful gene replacement.

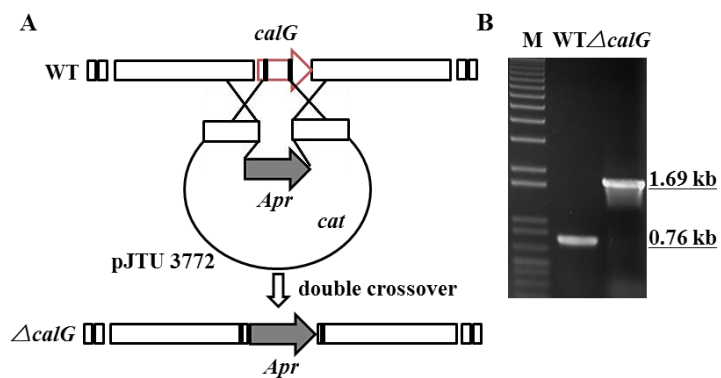

**Table S2. HPLC assay of calcimycin and cezomycin production by *S. chartreusis* NRRL 3882, GLX 16 and GLX 17 strains grown in SFM liquid medium** (see **Materials and Methods** for a description of the procedures involved).

| Strain | Cezomycin (mM) | Calcimycin (mM) | Total (mM) |
|--------|----------------|-----------------|------------|
| WT     | 0.039±0.002    | 0.009±0.001     | 0.048      |
| GLX 16 | Not detected   | 0.044±0.005     | 0.044      |
| GLX 17 | 0.042±0.002    | 0.011±0.0005    | 0.053      |

**Fig. S5. CalG SNAC derivative substrate usage; HPLC analysis**

Traces (i) Standard compounds 1- compound 3, 2 - N-demethyl-calcimycin, 3 - cezomycin and 4 - calcimycin for reference, (ii) to (v) Substrate usage calcimycin-SNAC cezomycin-SNAC, N-demethyl-calcimycin-SNAC and compound 3-SNAC respectively (see the **Materials and Methods** for a full description of the experimental procedure employed).

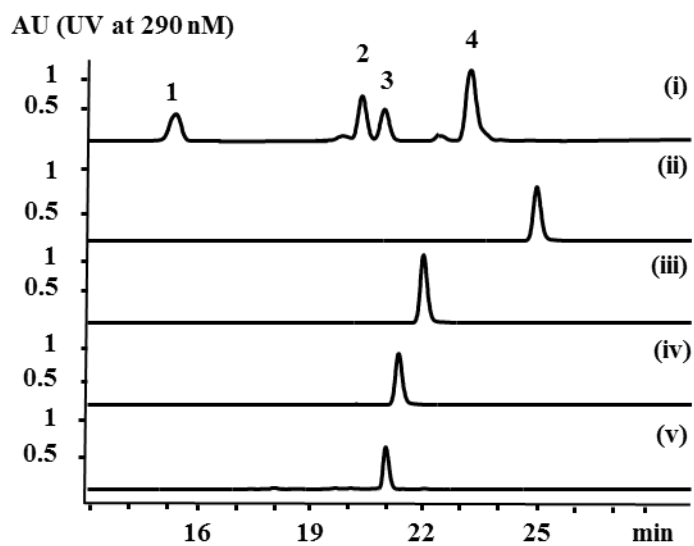

**Fig. S6. CalG CoA derivative substrate usage; HPLC analysis** Traces (i) CoA reference standard, (ii) to (vi) substrate usage acetyl-CoA, benzoyl-CoA, butyryl-CoA, malonyl-CoA, palmitoyl-CoA respectively. (see **Materials and Methods** for a full description of the experimental procedure employed).

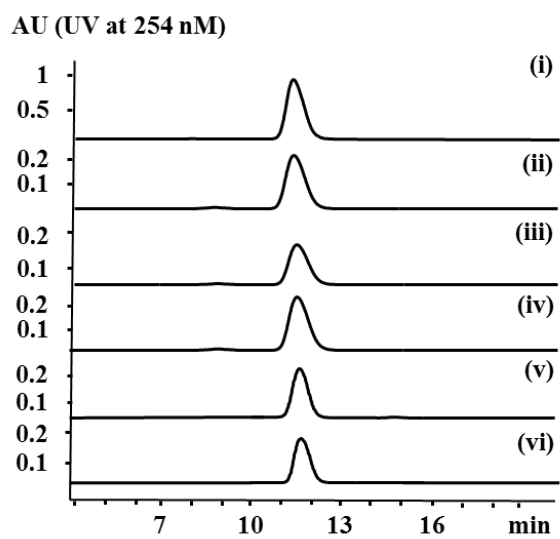

**Fig. S7. Saturation curves for CalG with cezomycin-CoA and other CoA derivatives (see Materials and Methods for a description of the CalG activity assay procedure involved).**

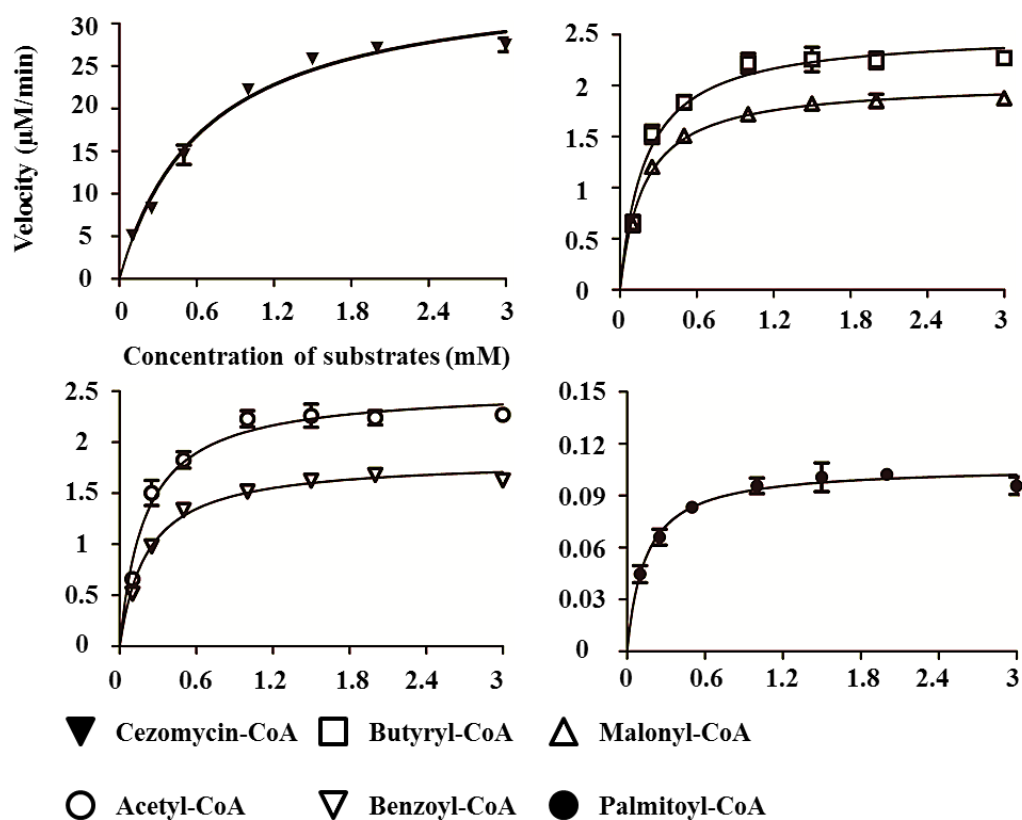

**Table S3. CalG substrate usage kinetics; compound 3, cezomycin, N-demethyl-calcimycin and calcimycin related CoA derivatives as substrates.** (For a full description of the procedures used see the **Materials and Methods.**)

| substrate                 | $K_m(\mu\text{M})$ | $k_{\text{cat}} (\text{min}^{-1})$ | $k_{\text{cat}}/K_m(\text{M}^{-1}\text{S}^{-1})$ | Relative $k_{\text{cat}}/K_m$ |
|---------------------------|--------------------|------------------------------------|--------------------------------------------------|-------------------------------|
| Cezomycin-CoA             | 670±61             | 17.77±0.55                         | 442                                              | 1                             |
| Compound3-CoA             | 160±24             | 0.053±0.002                        | 5.52                                             | 0.012                         |
| N-demethyl-calcimycin-CoA | 167±29             | 0.052±0.002                        | 5.19                                             | 0.011                         |
| Calcimycin-CoA            | 150±20             | 0.054±0.001                        | 6                                                | 0.013                         |

**Table S4. Effect of divalent cations on the production of calcimycin and cezomycin by *S. chartreusis* NRRL3882 WT in SFM liquid medium.** (For a full description of the procedure employed see the **Materials and Methods** describing LC/MS analysis of molecules of interest from fermentation cultures)

|                                | WT<br>control | Ca <sup>2+</sup><br>1mM | Ca <sup>2+</sup><br>5mM | Ca <sup>2+</sup><br>10mM | Mg <sup>2+</sup><br>1mM | Mg <sup>2+</sup><br>5mM | Mg <sup>2+</sup><br>10m<br>M | Mn <sup>2+</sup><br>1mM | Mn <sup>2+</sup><br>5mM | Mn <sup>2+</sup><br>10m<br>M | Fe <sup>2+</sup><br>0.5m<br>M | Fe <sup>2+</sup><br>1mM | Zn <sup>2+</sup><br>0.5m<br>M | Zn <sup>2+</sup><br>1mM |
|--------------------------------|---------------|-------------------------|-------------------------|--------------------------|-------------------------|-------------------------|------------------------------|-------------------------|-------------------------|------------------------------|-------------------------------|-------------------------|-------------------------------|-------------------------|
| Calci<br>myci<br>n<br>(mM<br>) | 0.009         | 0.024                   | 0.03                    | 0.032                    | 0.024                   | 0.034                   | 0.033                        | 0.028                   | 0.039                   | 0.04                         | 0.035                         | 0.039                   | 0.008                         | 0.009                   |
| Stand<br>ard<br>error          | 0.001         | 0.000<br>6              | 0.0006                  | 0.002                    | 0.001                   | 0.002                   | 0.004                        | 0.002                   | 0.002                   | 0.003                        | 0.003                         | 0.003                   | 0.000<br>5                    | 0.000<br>6              |
| Cezo<br>myci<br>n<br>(mM<br>)  | 0.039         | 0.025                   | 0.022                   | 0.01                     | 0.023                   | 0.008                   | 0.009                        | 0.019                   | 0.009                   | 0.009                        | 0.015                         | 0.007                   | 0.038                         | 0.039                   |
| Stand<br>ard<br>error          | 0.002         | 0.002                   | 0.0006                  | 0.0008                   | 0.001                   | 0.001                   | 0.000<br>6                   | 0.001                   | 0.000<br>3              | 0.001                        | 0.000<br>5                    | 0.000<br>4              | 0.000<br>5                    | 0.003                   |
| Total<br>(mM<br>)              | 0.048         | 0.049                   | 0.052                   | 0.042                    | 0.047                   | 0.042                   | 0.042                        | 0.047                   | 0.048                   | 0.049                        | 0.050                         | 0.046                   | 0.046                         | 0.048                   |

**Fig. S8. Calcimycin production by *S. chartreusis* NRRL 3882 WT cultured in SFM liquid medium over nine days** (A) total amount of calcimycin present, (B) ratios of the amount of calcimycin to cezomycin present (For a full description of the procedure employed see the **Supplemental Methods**).

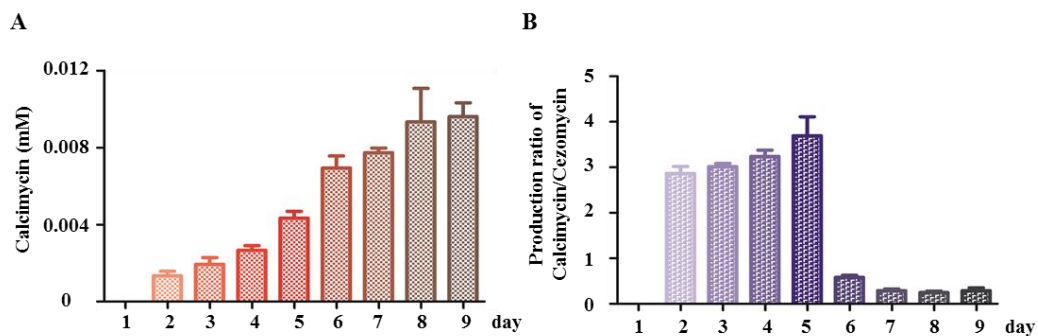



**Fig. S9. *calG* transcript profiling.**

RNAs were extracted from cells of *S. chartreusis* NRRL 3882 grown in the presence of either 10 mM MnCl<sub>2</sub>, CaCl<sub>2</sub>, MgCl<sub>2</sub>, or 1 mM FeCl<sub>2</sub>, reverse transcribed and quantified as described in the **Supplemental Methods** section, the relative transcript level for *calG* after 120 h incubation only is shown. No *calG* transcripts were detected at 48h incubation. Error bars indicate the standard deviations of the means derived from three experiments. .

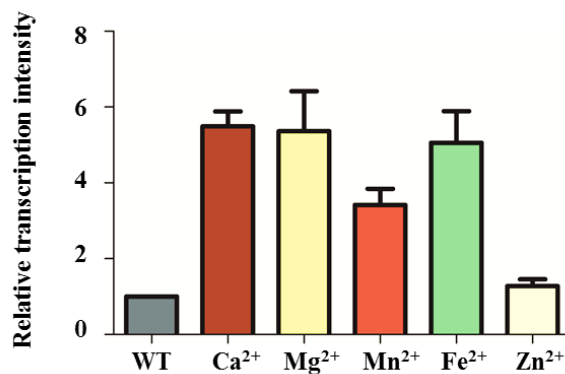

**Fig. S10. Initial velocities of CalG hydrolysis of acetyl-CoA in the presence of divalent cations** (see **Materials and Methods** for a full description of the CalG protein activity assay procedure involved).

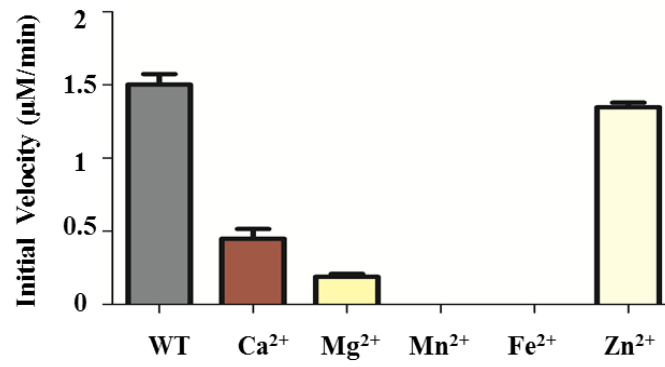

Supplement: AEM.00587-18_zam012188557s1.pdf [file AEM.00587-18_zam012188557s1.pdf]
